# Supplementary material for: Efficacy and Failure Patterns of Early SBRT to the Primary Tumor in Advanced EGFR-Mutation-Positive Lung Cancer with EFGR-TKI Treatment: A Prospective, Single Arm, Phase II Study
Source: MDPI journal article supplement (doi:10.3390/life12121954), 2022-11-22
Supplement: s1 [file s1]

**Table S1.** Univariate and multivariate analysis of covariables associated with PFS.

|                                          | Univariate analysis |          |         | Multivariate analysis |          |         |
|------------------------------------------|---------------------|----------|---------|-----------------------|----------|---------|
|                                          | HR                  | 95%CI    | P value | HR                    | 95%CI    | P value |
| Age, year ( $\leq 66$ vs $>66$ )         | 1.3                 | 0.7-2.6  | 0.40    |                       |          |         |
| Sex (Female vs Male)                     | 1.0                 | 0.5-1.9  | 0.90    |                       |          |         |
| Smoke (No vs Yes)                        | 1.1                 | 0.5-2.2  | 0.80    |                       |          |         |
| ECOG PS (0 vs1)                          | 0.9                 | 0.4-1.7  | 0.70    |                       |          |         |
| T (T1-2 vs T3-4)                         | 0.4                 | 0.2-0.8  | 0.02    | 0.8                   | 0.3-1.9  | 0.60    |
| N (N0-1 vs N2-3)                         | 1.0                 | 0.5-2.0  | 0.90    |                       |          |         |
| No. of metastasis ( $>5$ vs 0-5 lesions) | 5.8                 | 2.0-16.8 | 0.001   | 4.3                   | 1.3-15.0 | 0.02    |
| EGFR mutation (L858R vs 19-del)          | 2.1                 | 1.0-4.0  | 0.03    | 2.8                   | 1.4-5.6  | 0.005   |
| Response before radiotherapy (SD vs PR)  | 12.1                | 1.6-90.7 | 0.02    | 5.2                   | 0.6-42.5 | 0.10    |

HR: hazard ratio; CI: confidence interval.

**Table S2.** Univariate and multivariate analysis of covariables associated with OS.

| Independent Variable                                    | Univariate analysis |          |         | Multivariate analysis |          |         |
|---------------------------------------------------------|---------------------|----------|---------|-----------------------|----------|---------|
|                                                         | HR                  | 95%CI    | P value | HR                    | 95%CI    | P value |
| Age, year ( $\leq 66$ vs $>66$ )                        | 1.3                 | 0.6-2.8  | 0.5     |                       |          |         |
| Sex (Female vs Male)                                    | 1.0                 | 0.5-2.2  | 0.9     |                       |          |         |
| Smoke (No vs Yes)                                       | 0.8                 | 0.4-1.7  | 0.5     |                       |          |         |
| ECOG PS (0 vs1)                                         | 1.2                 | 0.6-2.7  | 0.6     |                       |          |         |
| T (T1-2 vs T3-4)                                        | 0.5                 | 0.2-1.2  | 0.1     |                       |          |         |
| N (N0-1 vs N2-3)                                        | 1.3                 | 0.5-3.3  | 0.6     |                       |          |         |
| Number of metastasis( $\leq 5$ lesions vs $>5$ lesions) | 3.2                 | 0.7-13.8 | 0.1     | 0.3                   | 0.7-16.7 | 0.12    |
| EGFR mutation (L858R vs 19-del)                         | 3.5                 | 1.4-9.2  | 0.01    | 3.5                   | 1.4-9.2  | 0.01    |
| Response before radiotherapy (SD vs PR)                 | 4.8                 | 0.6-35.6 | 0.1     |                       |          |         |

HR: hazard ratio; CI: confidence interval.
